# Supplementary material for: Morphological Analysis of Tumor Microenvironment in HER2-Positive Breast Cancer: Predicting Response to Neoadjuvant Chemotherapy on Histopathological Images
Source: Research Square preprint supplement (doi:10.21203/rs.3.rs-5786592/v1), 2025-04-04
Supplement: Supplementary file 1 [file 1b3e579b3f8b21602c096ddc.xlsx]

## Sheet: Sheet1
FEATURE NAME	FEATURE TYPE
AREA	LARGEST REGION
CONVEX AREA	LARGEST REGION
ECCENTRICITY	LARGEST REGION
EULER_NUMBER	LARGEST REGION
EXTENT	LARGEST REGION
FILLED AREA	LARGEST REGION
MAJOR AXIS LENGTH	LARGEST REGION
MINOR AXIS LENGTH	LARGEST REGION
PERIMETER	LARGEST REGION
COMPACTNESS	LARGEST REGION
SOLIDITY	LARGEST REGION
NUMBER OF REGIONS	ALL REGION
CONVEX AREA	ALL REGION
EULER NUMBER	ALL REGION
FILLED AREA NUMBER	ALL REGION
MAJOR AXIS LENGTH	ALL REGION
MINOR AXIS LENGTH	ALL REGION
PERIMETER	ALL REGION
COMPACTNESS	ALL REGION
AREA	ALL REGION
ECCENTRICITY	ALL REGION
EXTENT	ALL REGION
SOLIDITY	ALL REGION
NUMBER	SIGNIFICANT REGIONS
MEAN_AND_STD_OF_ECCENTRICITY	SIGNIFICANT REGIONS
MEAN_AND_STD_OF_EXTENT	SIGNIFICANT REGIONS
MEAN_AND_STD_OF_SOLIDITY	SIGNIFICANT REGIONS
MEAN_AND_STD_OF_COMPACTNESS	SIGNIFICANT REGIONS
MEAN_AND_STD_OF_AREA	SIGNIFICANT REGIONS
MEAN_AND_STD_OF_CONVERX_AREA	SIGNIFICANT REGIONS
MEAN_AND_STD_OF_EULER_NUMBER	SIGNIFICANT REGIONS
MEAN_AND_STD_OF_FILLED AREA	SIGNIFICANT REGIONS
MEAN_AND_STD_OF_MAJOR AXIS LENGTH	SIGNIFICANT REGIONS
MEAN_AND_STD_OF_MINOR AXIS LENGTH	SIGNIFICANT REGIONS
MEAN_AND_STD_OF_PERIMETER	SIGNIFICANT REGIONS
HER2/CEP17 RATIO	CLINIC
ER	CLINIC
ER%	CLINIC
PR	CLINIC
PR%	CLINIC
