# Supplementary material for: Morphological Analysis of Tumor Microenvironment in HER2-Positive Breast Cancer: Predicting Response to Neoadjuvant Chemotherapy on Histopathological Images
Source: Research Square preprint supplement (doi:10.21203/rs.3.rs-5786592/v1), 2025-04-04
Supplement: Supplementary file 2 [file a76af961a1760b3e48ab1414.xlsx]

## Sheet: YALE_RESPONSE_non-TILs
Feature Name	P_value	t value
significance_area_filled_mean	0.025763	2.27268
significance_perimeter_std	0.0327963	2.17275
significance_axis_minor_length_mean	0.0477149	2.0112
significance_area_std	0.0489631	1.99976
largest_euler_number	0.0544804	-1.95093
largest_area_convex	0.0552882	1.9443
largest_perimeter	0.0571668	1.92919
largest_compactness	0.0593852	1.91187
largest_area	0.0595361	1.91071
largest_area_filled	0.0602922	1.90495
significance_euler_number_std	0.0620023	1.89313
significance_eccentricity_std	0.0640951	1.87783
significance_extent_std	0.0770675	-1.79135
significance_number	0.0865325	1.73481
significance_solidity_std	0.0897421	1.71785
significance_perimeter_mean	0.0930686	1.69998
significance_axis_major_length_std	0.0960418	1.68445
largest_axis_major_length	0.111077	1.61075
largest_axis_minor_length	0.111521	1.60872
significance_axis_major_length_mean	0.113411	1.60081
significance_compactness_std	0.11367	1.59964
significance_axis_minor_length_std	0.133678	1.51534
all_perimeter	0.139403	1.49251
all_compactness	0.155015	1.43526
significance_euler_number_mean	0.170013	1.3848
all_convex_area	0.203966	1.28054
significance_area_convex_mean	0.232091	1.20424
HER2/CEP17 ratio	0.211021	-1.2605
all_minor_axis_length_number	0.301418	1.03995
significance_eccentricity_mean	0.310104	-1.02157
all_filled_area_number	0.329139	0.981692
all_area	0.339798	0.96016
largest_solidity	0.36299	-0.914778
significance_area_convex_std	0.372738	0.896446
significance_area_filled_std	0.392519	0.859767
PR%	0.428256	-0.796082
all_euler_number	0.430514	-0.792227
all_extent	0.466286	-0.73195
significance_compactness_mean	0.494136	0.686933
all_solidity	0.506325	-0.667503
all_major_axis_length_number	0.516164	0.652094
significance_extent_mean	0.526919	0.63553
ER%	0.536141	-0.621244
all_number	0.557282	-0.589297
PR	0.58643	0.546148
significance_solidity_mean	0.619342	0.498749
ER	0.667328	0.431356
largest_eccentricity	0.712077	-0.370349
significance_area_mean	0.840491	0.201929
largest_extent	0.85959	-0.177453
all_eccentricity	0.990702	-0.0116896

## Sheet: YALE_RESPONSE_non-tumor
Feature Name	P_value	t value
significance_area_convex_mean	0.0289209	2.22367
all_number	0.0450188	-2.03523
all_solidity	0.0471742	-2.0147
all_eccentricity	0.0476003	-2.01073
all_extent	0.0489631	-1.99021
all_major_axis_length_number	0.0592084	-1.91291
all_minor_axis_length_number	0.0639054	-1.87791
all_euler_number	0.0876436	-1.72835
significance_compactness_mean	0.131896	1.52184
significance_extent_mean	0.140726	1.48747
significance_eccentricity_mean	0.154682	-1.43644
all_compactness	0.164207	-1.40347
significance_extent_std	0.226927	-1.21745
HER2/CEP17 ratio	0.236024	-1.19373
largest_solidity	0.246574	1.16695
all_perimeter	0.265711	-1.12055
significance_area_convex_std	0.28795	1.06957
significance_compactness_std	0.291895	1.0608
significance_axis_major_length_mean	0.295543	1.05276
all_area	0.377106	-0.888002
significance_perimeter_mean	0.380143	0.882394
largest_eccentricity	0.389396	-0.865249
all_filled_area_number	0.410159	-0.827798
all_convex_area	0.416405	-0.816758
significance_axis_minor_length_std	0.420789	0.809117
PR%	0.428256	-0.796082
largest_euler_number	0.448092	-0.762215
significance_area_mean	0.472148	0.722328
largest_area	0.485592	0.700471
largest_area_filled	0.486172	0.699537
largest_extent	0.493709	0.68746
ER%	0.536141	-0.621244
largest_axis_minor_length	0.537137	-0.619724
largest_axis_major_length	0.559262	0.586304
PR	0.58643	0.546148
largest_perimeter	0.606481	0.517072
significance_euler_number_mean	0.615623	0.503986
significance_number	0.619618	0.498261
significance_euler_number_std	0.629312	-0.484515
largest_area_convex	0.650893	0.454169
ER	0.667328	0.431356
largest_compactness	0.750269	0.319343
significance_solidity_std	0.758456	0.308537
significance_eccentricity_std	0.759342	-0.307369
significance_area_filled_mean	0.801994	-0.251581
significance_area_filled_std	0.802518	-0.250902
significance_axis_minor_length_mean	0.820826	0.22721
significance_area_std	0.844179	0.197175
significance_solidity_mean	0.880129	0.151277
significance_perimeter_std	0.989304	-0.0134466
significance_axis_major_length_std	0.997457	-0.0031967

## Sheet: IMPRESS_HER2_non-TILs
Feature Name	P_value	t value
significance_number	0.00312172	-3.08445
ER%	0.00517256	-2.90242
significance_extent_mean	0.00555861	-2.8932
PR%	0.0066691	-2.81058
PR	0.00804776	-2.74149
significance_solidity_mean	0.00876123	-2.72404
all_euler_number	0.00902085	2.70212
all_extent	0.0134368	2.54999
all_solidity	0.0143591	2.52411
all_number	0.0154243	2.49602
ER	0.0219008	-2.35333
HER2/CEP17 ratio	0.0230912	2.33172
significance_eccentricity_mean	0.0349811	2.16522
significance_area_mean	0.0405317	-2.10072
significance_compactness_mean	0.0460174	-2.04415
significance_euler_number_std	0.0642755	-1.89046
all_eccentricity	0.072826	1.82713
significance_eccentricity_std	0.252737	-1.15656
largest_area_convex	0.307794	-1.02891
significance_area_std	0.309789	-1.02568
significance_axis_minor_length_mean	0.31769	-1.00891
significance_extent_std	0.330829	0.981626
significance_perimeter_std	0.331062	-0.98115
largest_euler_number	0.336969	0.968191
all_major_axis_length_number	0.34252	0.957039
significance_perimeter_mean	0.367981	-0.908165
significance_area_filled_mean	0.404972	-0.839607
largest_area_filled	0.429688	-0.795289
significance_area_filled_std	0.436103	0.784849
largest_axis_major_length	0.444012	-0.770702
largest_perimeter	0.463241	-0.738413
significance_area_convex_mean	0.470074	-0.72768
significance_compactness_std	0.491289	-0.693168
largest_compactness	0.492772	-0.690278
significance_axis_major_length_mean	0.495223	-0.686859
significance_solidity_std	0.500167	-0.678971
significance_axis_minor_length_std	0.518495	-0.650091
significance_euler_number_mean	0.520499	-0.646967
largest_solidity	0.528725	-0.633766
all_area	0.572672	0.567341
significance_axis_major_length_std	0.575039	-0.564207
all_filled_area_number	0.590493	0.541126
all_minor_axis_length_number	0.602963	0.523005
largest_axis_minor_length	0.630267	0.483917
all_perimeter	0.641984	-0.467374
all_compactness	0.667812	-0.431352
largest_extent	0.763618	-0.302151
all_convex_area	0.879232	-0.152614
largest_eccentricity	0.894351	-0.133385
significance_area_convex_std	0.95869	0.0520475

## Sheet: IMPRESS_HER2_non-tumor
Feature Name	P_value	t value
all_minor_axis_length_number	0.00466333	2.93938
ER%	0.00517256	-2.90242
all_major_axis_length_number	0.00591118	2.8544
PR%	0.0066691	-2.81058
PR	0.00804776	-2.74149
all_compactness	0.0148176	2.50923
all_eccentricity	0.0166322	2.46377
ER	0.0219008	-2.35333
HER2/CEP17 ratio	0.0230912	2.33172
all_perimeter	0.0243992	2.30908
significance_area_convex_std	0.0250409	2.30041
significance_area_convex_mean	0.0267162	-2.27348
significance_solidity_mean	0.0308315	-2.21321
all_area	0.0334785	2.17632
all_filled_area_number	0.0370797	2.13236
significance_area_mean	0.0392881	-2.10883
all_number	0.0401363	2.09787
all_convex_area	0.041741	2.08068
all_solidity	0.0477536	2.02095
all_extent	0.0529197	1.97461
significance_perimeter_mean	0.104504	1.64924
largest_axis_major_length	0.112559	1.6104
significance_axis_major_length_mean	0.121454	1.57173
significance_extent_std	0.124173	-1.56012
significance_compactness_mean	0.126889	-1.54872
significance_compactness_std	0.12741	1.54656
largest_euler_number	0.134036	-1.51892
all_euler_number	0.135308	1.51387
significance_axis_minor_length_std	0.136745	1.50893
significance_area_filled_std	0.148283	1.46514
significance_euler_number_mean	0.167287	1.3985
largest_area_filled	0.17705	1.36596
significance_number	0.198875	-1.29911
largest_perimeter	0.21587	1.25078
largest_area_convex	0.216889	1.24797
largest_axis_minor_length	0.222485	1.23273
significance_euler_number_std	0.230275	1.2124
significance_solidity_std	0.241829	1.18251
significance_eccentricity_mean	0.253899	1.15236
largest_compactness	0.282782	1.08382
significance_area_std	0.288298	1.07169
significance_axis_minor_length_mean	0.29211	1.06317
significance_eccentricity_std	0.350268	0.941669
significance_perimeter_std	0.413101	0.824379
largest_solidity	0.41371	-0.823101
significance_area_filled_mean	0.551301	0.599309
largest_extent	0.761293	-0.305169
significance_extent_mean	0.817197	0.232204
largest_eccentricity	0.820517	0.227877
significance_axis_major_length_std	0.893755	0.134141
