# Supplementary material for: Morphological Analysis of Tumor Microenvironment in HER2-Positive Breast Cancer: Predicting Response to Neoadjuvant Chemotherapy on Histopathological Images
Source: Research Square preprint supplement (doi:10.21203/rs.3.rs-5786592/v1), 2025-04-04
Supplement: Supplementary file 3 [file b8133efd9bb48c3b672193c9.xlsx]

## Sheet: YALE_RESPONSE_non-TILs
feature namec	P_value	R value
ER%	0.0815631	0.190001
HER2/CEP17 ratio	0.133691	0.16498
significance_solidity_std	0.158108	-0.158299
PR%	0.207391	0.138139
largest_axis_minor_length	0.2401	-0.129575
significance_axis_minor_length_mean	0.26708	-0.124769
significance_area_std	0.26708	-0.124769
all_euler_number	0.267973	0.122242
largest_euler_number	0.291538	0.116436
significance_eccentricity_mean	0.304601	0.115481
significance_euler_number_std	0.323269	-0.111138
largest_solidity	0.328518	0.107916
significance_perimeter_std	0.338656	-0.107678
significance_extent_std	0.360595	0.102911
significance_eccentricity_std	0.368194	-0.101302
all_solidity	0.368769	0.0993104
all_extent	0.374731	0.098086
all_number	0.375249	0.0979802
largest_area_convex	0.39315	-0.0943761
significance_number	0.412952	-0.090501
significance_area_filled_mean	0.413966	-0.0920077
largest_area	0.445093	-0.0844341
largest_area_filled	0.445093	-0.0844341
significance_area_convex_mean	0.453011	-0.0845429
significance_axis_major_length_std	0.4837	-0.0789233
largest_perimeter	0.51766	-0.0715706
all_eccentricity	0.544984	0.0669721
largest_compactness	0.558722	-0.064703
largest_axis_major_length	0.561806	-0.0641974
significance_extent_mean	0.568378	-0.0643164
largest_eccentricity	0.678551	0.0458829
all_compactness	0.711988	-0.0408773
largest_extent	0.717903	0.0400006
significance_compactness_mean	0.728715	-0.0391307
significance_solidity_mean	0.739472	-0.0375205
all_major_axis_length_number	0.744164	0.0361369
significance_area_filled_std	0.744182	-0.0368177
all_perimeter	0.762911	-0.0334051
all_filled_area_number	0.786964	0.0299291
all_area	0.786964	0.0299291
significance_euler_number_mean	0.835489	-0.0234352
PR	0.836242	0.022754
significance_axis_minor_length_std	0.84153	-0.022563
all_convex_area	0.86703	0.0185446
significance_perimeter_mean	0.903688	-0.0136566
significance_axis_major_length_mean	0.917429	-0.0117007
significance_compactness_std	0.917429	-0.0117007
significance_area_mean	0.947665	0.00740824
all_minor_axis_length_number	0.961389	-0.0053623
ER	0.963013	0.00510539
significance_area_convex_std	0.974975	0.00354049

## Sheet: YALE_RESPONSE_non-tumor
feature namec	P_value	R value
significance_area_convex_mean	0.00567255	-0.299341
significance_compactness_mean	0.0233789	-0.247221
significance_solidity_std	0.053686	-0.211293
significance_extent_mean	0.0544757	-0.210616
largest_euler_number	0.0649701	0.201096
ER%	0.0815631	0.190001
all_major_axis_length_number	0.119013	0.170374
largest_compactness	0.127128	-0.166774
largest_perimeter	0.129258	-0.165859
significance_extent_std	0.132303	0.165563
HER2/CEP17 ratio	0.133691	0.16498
all_euler_number	0.13933	0.16168
significance_perimeter_std	0.144307	-0.160663
significance_area_std	0.144745	-0.16049
all_minor_axis_length_number	0.163238	0.152601
largest_area_filled	0.170979	-0.149875
significance_axis_minor_length_mean	0.185595	-0.145842
largest_area	0.187068	-0.144485
significance_eccentricity_mean	0.193663	0.143235
all_eccentricity	0.202421	0.139648
PR%	0.207391	0.138139
significance_area_filled_mean	0.234053	-0.131242
significance_area_mean	0.235694	-0.130787
all_number	0.236196	0.12986
all_solidity	0.245015	0.127468
largest_area_convex	0.275373	-0.119657
all_extent	0.287579	0.11668
significance_compactness_std	0.298081	-0.114879
significance_axis_minor_length_std	0.302647	-0.113806
significance_axis_major_length_mean	0.309344	-0.112251
significance_euler_number_mean	0.375497	-0.0979296
significance_perimeter_mean	0.377509	-0.0975195
significance_solidity_mean	0.385728	-0.0958583
largest_axis_major_length	0.416316	-0.0893097
significance_eccentricity_std	0.441178	-0.0851595
largest_axis_minor_length	0.464877	-0.080332
significance_axis_major_length_std	0.469823	-0.0799317
significance_number	0.471988	-0.0790617
significance_area_filled_std	0.489332	-0.07647
significance_euler_number_std	0.496787	-0.0751667
all_compactness	0.497149	0.0746484
significance_area_convex_std	0.571201	-0.0626648
all_perimeter	0.696066	0.0429874
largest_solidity	0.722976	-0.0390122
all_area	0.741343	0.0363278
all_filled_area_number	0.79207	0.0290177
PR	0.836242	0.022754
all_convex_area	0.875348	0.0172693
largest_eccentricity	0.880848	-0.0165016
largest_extent	0.897415	-0.0141936
ER	0.963013	0.00510539

## Sheet: IMPRESS_HER2_non-TILs
feature namec	P_value	R value
HER2/CEP17 ratio	0.00606648	-0.344771
significance_number	0.00872903	0.335736
PR%	0.0156741	0.30572
ER%	0.018056	0.299455
PR	0.029699	0.276332
significance_axis_minor_length_std	0.0322235	-0.291889
significance_euler_number_mean	0.0331332	-0.290434
all_eccentricity	0.0358828	-0.271484
all_euler_number	0.0362513	-0.270967
significance_area_convex_std	0.0370115	-0.284581
significance_solidity_mean	0.0392073	0.281488
significance_area_filled_std	0.0424222	-0.277209
significance_compactness_std	0.0463195	-0.272364
significance_axis_major_length_mean	0.0463695	-0.272304
all_extent	0.0479568	-0.256434
all_number	0.0496235	-0.254609
all_solidity	0.0518962	-0.252201
significance_perimeter_mean	0.0551335	-0.262527
all_major_axis_length_number	0.0610924	-0.243252
all_convex_area	0.0667833	-0.238247
all_filled_area_number	0.0679737	-0.237244
all_area	0.0679737	-0.237244
significance_area_mean	0.0782756	0.241701
significance_euler_number_std	0.0813414	0.239326
ER	0.0843189	0.221
all_minor_axis_length_number	0.0871743	-0.222726
all_perimeter	0.0965132	-0.216564
all_compactness	0.096675	-0.216461
largest_axis_minor_length	0.103086	-0.212501
significance_eccentricity_mean	0.10502	-0.223019
largest_compactness	0.121749	-0.201962
significance_compactness_mean	0.128008	0.209715
significance_extent_mean	0.141704	0.202631
largest_perimeter	0.142173	-0.191756
largest_area	0.169504	-0.179689
largest_area_filled	0.169504	-0.179689
largest_area_convex	0.20196	-0.167083
largest_eccentricity	0.234959	0.155667
largest_euler_number	0.334685	0.126707
largest_axis_major_length	0.343384	-0.124463
significance_area_std	0.346167	0.130704
significance_extent_std	0.454299	0.103983
significance_axis_minor_length_mean	0.469124	0.100615
significance_eccentricity_std	0.579238	0.0771502
largest_solidity	0.655376	0.0588051
significance_axis_major_length_std	0.692105	0.055138
significance_area_convex_mean	0.811684	0.03319
significance_perimeter_std	0.828647	0.0301522
significance_solidity_std	0.866821	-0.0233643
largest_extent	0.909097	-0.0150562
significance_area_filled_mean	0.986484	-0.00236051

## Sheet: IMPRESS_HER2_non-tumor
feature namec	P_value	R value
all_minor_axis_length_number	0.00431424	-0.35769
HER2/CEP17 ratio	0.00606648	-0.344771
all_perimeter	0.0072085	-0.338027
all_major_axis_length_number	0.0075396	-0.336247
all_compactness	0.00834248	-0.3322
all_convex_area	0.0121381	-0.316728
all_filled_area_number	0.01217	-0.316617
significance_solidity_mean	0.0127204	0.31988
all_area	0.0133832	-0.31257
PR%	0.0156741	0.30572
significance_area_convex_std	0.0180146	-0.304477
ER%	0.018056	0.299455
significance_area_mean	0.0195285	0.300793
significance_perimeter_mean	0.0226981	-0.293806
significance_area_convex_mean	0.024291	0.290602
all_eccentricity	0.0290985	-0.277317
PR	0.029699	0.276332
significance_axis_major_length_mean	0.0298268	-0.280693
significance_compactness_std	0.0330318	-0.275643
significance_axis_minor_length_std	0.0445224	-0.260363
largest_axis_major_length	0.0534509	-0.246488
significance_area_filled_std	0.0582304	-0.245913
all_solidity	0.0591327	-0.241034
all_number	0.0592163	-0.240957
significance_extent_std	0.0615703	0.242818
all_extent	0.0641879	-0.236527
significance_euler_number_mean	0.0669946	-0.238068
largest_area_convex	0.0719744	-0.230114
largest_euler_number	0.0731248	0.229215
ER	0.0843189	0.221
largest_compactness	0.0854866	-0.220194
largest_area	0.0867366	-0.219341
largest_perimeter	0.0885384	-0.218127
largest_area_filled	0.0938746	-0.214644
largest_axis_minor_length	0.102041	-0.209602
all_euler_number	0.145208	-0.187167
significance_compactness_mean	0.207746	0.164991
significance_number	0.255537	0.146601
significance_eccentricity_mean	0.339914	-0.125354
significance_eccentricity_std	0.437209	-0.102186
significance_euler_number_std	0.531931	-0.0822891
significance_solidity_std	0.565813	-0.0756171
significance_axis_major_length_std	0.611004	-0.0670009
largest_eccentricity	0.636084	-0.0612846
significance_area_std	0.660377	-0.0578956
largest_solidity	0.67293	0.0546832
significance_axis_minor_length_mean	0.690112	-0.0525421
significance_extent_mean	0.700121	-0.0507592
significance_area_filled_mean	0.722427	-0.046818
significance_perimeter_std	0.730036	-0.0454831
largest_extent	0.743607	0.0423831
